# Supplementary material for: Urinary Comprehensive Genomic Profiling Correlates Urothelial Carcinoma Mutations with Clinical Risk and Efficacy of Intervention
Source: MDPI journal article supplement (doi:10.3390/jcm11195827), 2022-09-30
Supplement: s1 [file s1]

Supplementary Materials

# Urinary Comprehensive Genomic Profiling Correlates Urothelial Carcinoma Mutations with Clinical Risk and Efficacy of Intervention

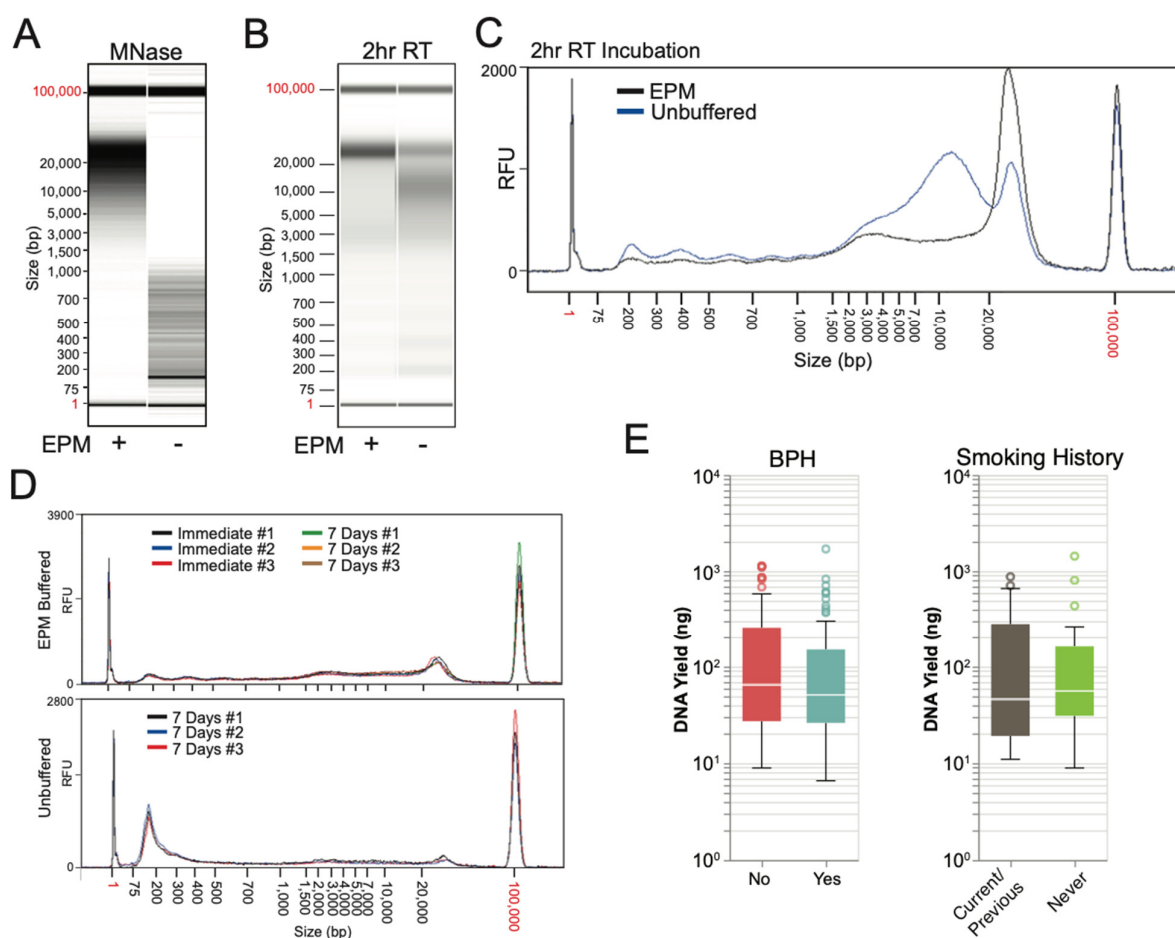

**Figure S1. UroAmplitude test procedure development.** (A) Fragment analyzer (FA) gel view of purified DNA incubated with micrococcal nuclease (MNase) in the presence (+) or absence (-) of Enhanced Preservation Media (EPM). (B,C) FA gel and electrophoretogram view of purified DNA following 2 h room temperature incubation in the presence (+) or absence (-) of EPM. (D) FA electrophoretogram profiles of purified DNA following either immediate or 7 day incubation with EPM (top panel) or without EPM (bottom panel). Each incubation and extraction is performed in triplicate. (E) Median DNA extraction yields among individuals with and without benign prostatic hyperplasia (BPH) (n = 130, left panel) and among ever and never smokers (n = 33, right panel).

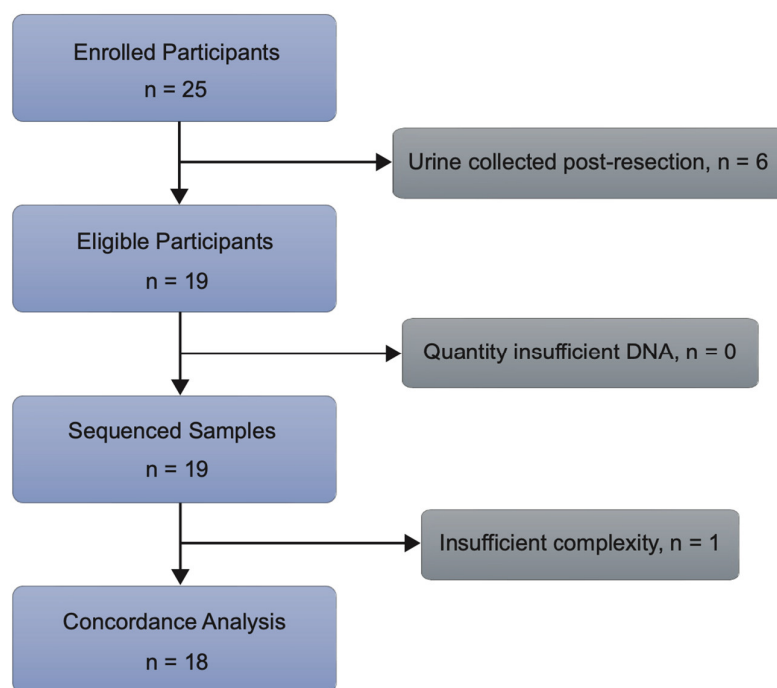

**Figure S2. STARD diagram of prospective concordance analysis.** Documentation of samples excluded from concordance analysis and justification.

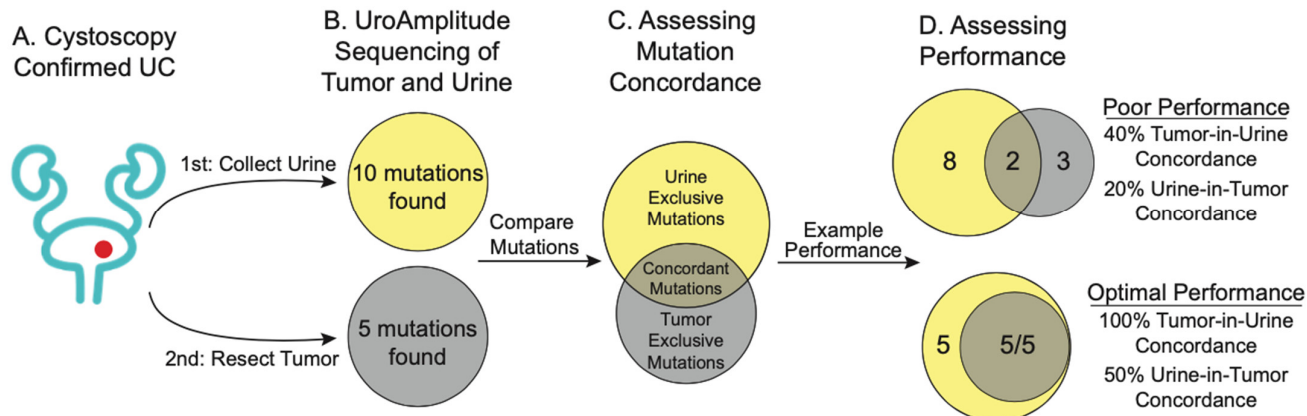

**Figure S3. Experimental design for assessing mutational concordance between urine and tumor.** (A,B) Matched tumor and urine samples are analyzed by UroAmplitude. In this example, we find ten mutations in the urine and five mutations in the tumor. Due to natural bladder clonality observed with age, and the likelihood of pre-cancerous, secondary lesions present elsewhere in the bladder, more mutations are expected to be found in the urine than the tumor. (C,D) Mutations found in the tumor and urine are compared to identify urine-exclusive events, tumor-exclusive events, and concordant events. In the optimal assay, all five tumor mutations are found in the urine (100% tumor-in-urine concordance) providing perfect comprehensive genomic profiling of the tumor from urine. Urine-exclusive mutations provide insight into bladder health beyond the tumor, and risk assessment can be made based on mutation type and allele frequency.

### A. Resolved, Patient 31

Primary Tumor, H&E Stain

Pathology: **HG, T1**

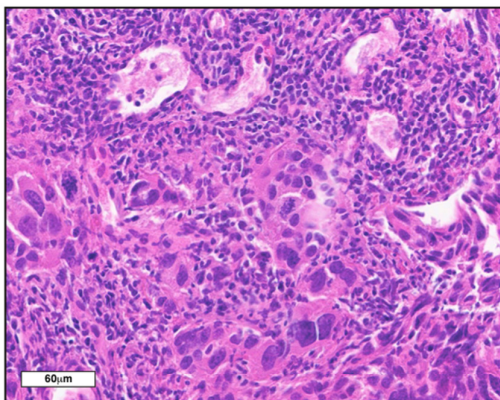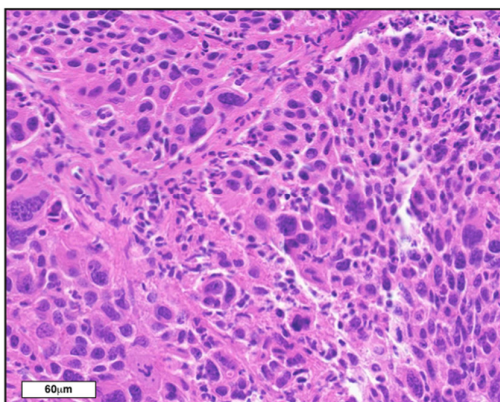

### B. Recurrence

Primary Tumor, H&E Stain

Pathology: **HG, T2**

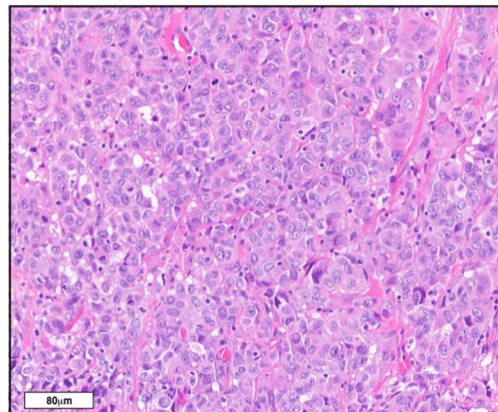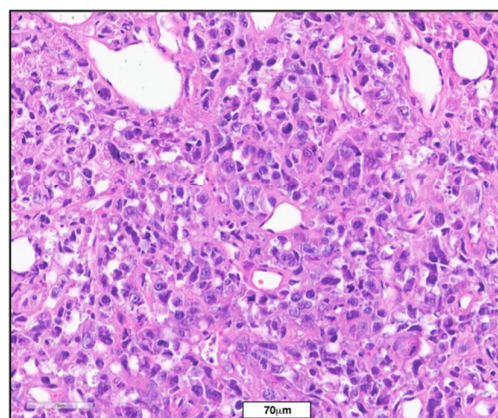

**Figure S4. Independent pathological assessment of UC tumors.** FFPE sample sections were stained with haematoxylin and eosin (H&E) and reviewed by a second independent pathologist to assess tumor grading.

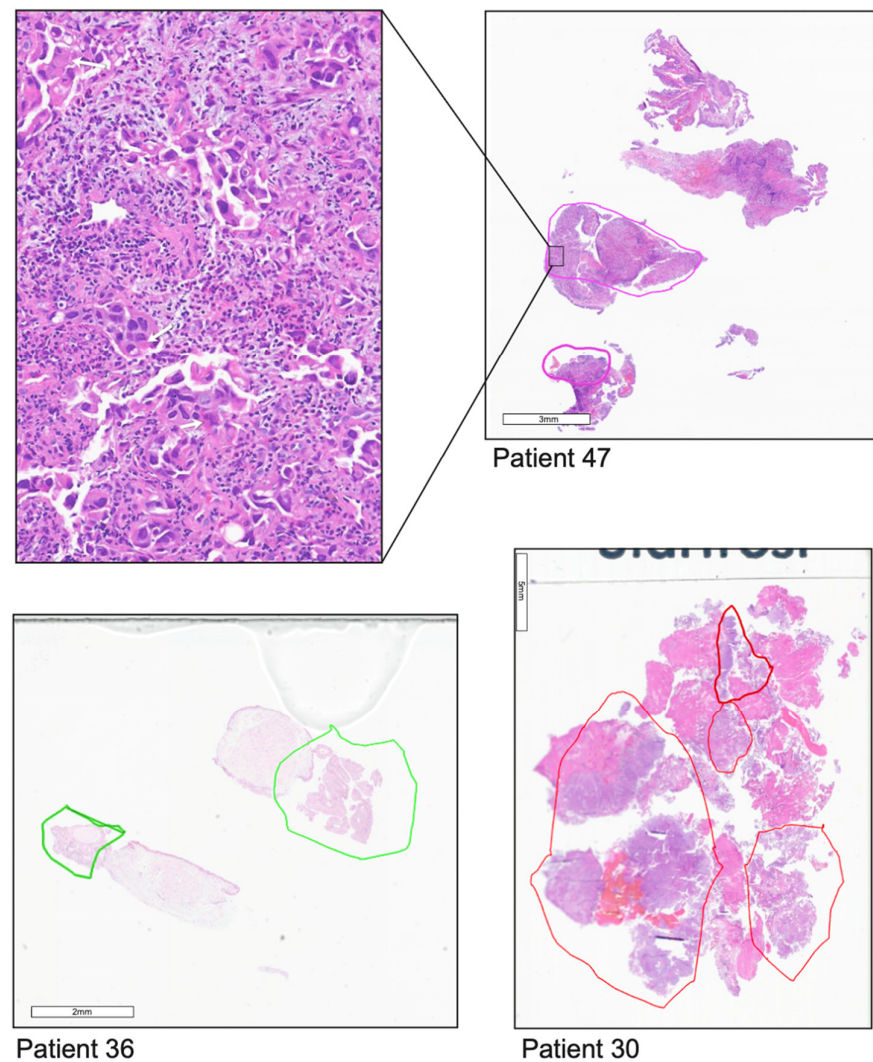

**Figure S5.** Preparation of FFPE tumor sample sections for DNA extraction. Slides with minority percentages of tumor tissue were annotated to highlight tumor and healthy tissue was removed by microdissection prior to DNA extraction.

**Table S1.** Cohort Clinical Characteristics.

| Cohort Clinical Characteristics |         |        |                |         |       |     |     | Analysis       |          |              |
|---------------------------------|---------|--------|----------------|---------|-------|-----|-----|----------------|----------|--------------|
| ID                              | Sample  | Source | Disease Status | Stage   | Grade | Age | Sex | Mutation       |          | Process      |
|                                 |         |        |                |         |       |     |     | Longi-tudi-nal | Onco-map | Concor-dance |
| 1                               | cgi_128 | urine  | negative       | t3, cis | hg    | 69  | m   | 0              | 0        | 0            |
| 2                               | cgi_127 | urine  | positive       |         | hg    | 80  | m   | 0              | 0        | 0            |
| 2                               | cgi_130 | urine  | positive       |         | hg    | 80  | m   | 0              | 0        | 0            |
| 2                               | cgi_131 | urine  | positive       |         | hg    | 80  | m   | 0              | 0        | 0            |
| 2                               | cgi_132 | urine  | positive       |         | hg    | 80  | m   | 0              | 0        | 0            |
| 2                               | cgi_158 | urine  | positive       |         | hg    | 80  | m   | 0              | 0        | 0            |
| 2                               | cgi_136 | urine  | positive       |         | hg    | 80  | m   | 0              | 0        | 0            |
| 3                               | cgi_122 | urine  | negative       |         |       | 87  | m   | 0              | 0        | 0            |
| 3                               | cgi_172 | urine  | negative       |         |       | 87  | m   | 0              | 0        | 0            |
| 3                               | cgi_167 | urine  | negative       |         |       | 87  | m   | 0              | 0        | 0            |



|    |         |       |          |        |    |    |   |   |   |   |   |
|----|---------|-------|----------|--------|----|----|---|---|---|---|---|
| 3  | cgi_185 | urine | negative | t1     | hg | 88 | m | 0 | 0 | 0 | 1 |
| 3  | cgi_183 | urine | negative | t1     | hg | 87 | m | 0 | 0 | 0 | 1 |
| 3  | cgi_133 | urine | negative |        |    | 87 | m | 0 | 0 | 0 | 1 |
| 3  | cgi_123 | urine | negative |        |    | 87 | m | 0 | 0 | 0 | 1 |
| 4  | cgi_234 | urine | negative |        |    | 61 | m | 0 | 0 | 0 | 1 |
| 6  | cgi_073 | urine | negative |        |    | 93 | f | 1 | 0 | 0 | 0 |
| 6  | cgi_072 | urine | negative |        |    | 93 | f | 1 | 0 | 0 | 0 |
| 6  | cgi_071 | urine | negative |        |    | 93 | f | 1 | 0 | 0 | 0 |
| 6  | cgi_070 | urine | positive | cis    | hg | 93 | f | 1 | 0 | 0 | 1 |
| 6  | cgi_088 | urine | positive | t1     | hg | 93 | f | 1 | 0 | 0 | 0 |
| 6  | cgi_074 | urine | negative |        |    | 93 | f | 1 | 0 | 0 | 0 |
| 7  | cgi_253 | urine | negative |        |    | 67 | f | 0 | 0 | 0 | 1 |
| 7  | cgi_250 | urine | negative |        |    | 67 | f | 0 | 0 | 0 | 1 |
| 9  | cgi_438 | urine | negative |        |    | 86 | m | 0 | 0 | 0 | 1 |
| 10 | cgi_076 | urine | positive |        | hg | 79 | m | 1 | 0 | 0 | 1 |
| 10 | cgi_078 | urine | negative |        | hg | 79 | m | 1 | 0 | 0 | 0 |
| 10 | cgi_079 | urine | negative |        | hg | 79 | m | 1 | 0 | 0 | 0 |
| 10 | cgi_254 | urine | negative |        |    | 79 | m | 0 | 0 | 0 | 1 |
| 10 | cgi_075 | urine | positive |        | hg | 79 | m | 1 | 0 | 0 | 1 |
| 10 | cgi_252 | urine | negative |        |    | 79 | m | 0 | 0 | 0 | 1 |
| 10 | cgi_245 | urine | positive |        |    | 79 | m | 0 | 0 | 0 | 1 |
| 10 | cgi_251 | urine | negative |        |    | 79 | m | 0 | 0 | 0 | 1 |
| 10 | cgi_249 | urine | negative |        |    | 79 | m | 0 | 0 | 0 | 1 |
| 10 | cgi_077 | urine | positive |        | hg | 79 | m | 1 | 0 | 0 | 1 |
| 10 | cgi_080 | urine | positive | ta,cis | hg | 79 | m | 1 | 0 | 0 | 1 |
| 11 | cgi_194 | urine | negative |        |    | 86 | f | 0 | 0 | 0 | 1 |
| 11 | cgi_212 | urine | negative |        |    | 87 | f | 0 | 0 | 0 | 1 |
| 11 | cgi_220 | urine | negative |        | hg | 87 | f | 0 | 0 | 0 | 1 |
| 12 | cgi_218 | urine | positive | cis    | hg | 94 | f | 0 | 0 | 0 | 1 |
| 12 | cgi_210 | urine | negative | cis    | hg | 94 | f | 0 | 0 | 0 | 1 |
| 12 | cgi_213 | urine | negative | cis    | hg | 94 | f | 0 | 0 | 0 | 1 |
| 13 | cgi_087 | urine | positive | cis    | hg | 70 | m | 1 | 0 | 0 | 1 |
| 13 | cgi_091 | urine |          |        |    | 70 | m | 1 | 0 | 0 | 0 |
| 13 | cgi_090 | urine |          |        |    | 70 | m | 1 | 0 | 0 | 0 |
| 13 | cgi_089 | urine |          |        |    | 70 | m | 1 | 0 | 0 | 0 |
| 13 | cgi_085 | urine | positive | cis    | hg | 70 | m | 1 | 0 | 0 | 1 |
| 13 | cgi_086 | urine |          |        |    | 70 | m | 1 | 0 | 0 | 0 |
| 13 | cgi_082 | urine | negative | cis    | hg | 70 | m | 1 | 0 | 0 | 0 |
| 13 | cgi_083 | urine |          |        |    | 70 | m | 1 | 0 | 0 | 0 |
| 13 | cgi_081 | urine | positive | cis    | hg | 70 | m | 1 | 0 | 0 | 0 |
| 13 | cgi_084 | urine |          |        |    | 70 | m | 1 | 0 | 0 | 0 |
| 14 | cgi_207 | urine | negative |        |    | 83 | f | 0 | 0 | 0 | 1 |
| 14 | cgi_195 | urine | negative |        |    | 83 | f | 0 | 0 | 0 | 1 |
| 14 | cgi_216 | urine | negative | ta     | lg | 83 | f | 0 | 0 | 0 | 1 |
| 15 | cgi_161 | urine | negative |        |    | 98 | m | 0 | 0 | 0 | 1 |
| 15 | cgi_166 | urine | negative |        |    | 98 | m | 0 | 0 | 0 | 1 |
| 16 | cgi_143 | urine | positive | t1     | hg | 89 | f | 0 | 0 | 0 | 1 |
| 16 | cgi_134 | urine | positive | t1     | hg | 89 | f | 0 | 0 | 0 | 1 |
| 17 | cgi_255 | urine | negative | ta     | hg | 77 | m | 0 | 0 | 0 | 1 |

|    |         |       |          |     |    |    |   |   |   |   |   |
|----|---------|-------|----------|-----|----|----|---|---|---|---|---|
| 17 | cgi_247 | urine | positive | ta  | lg | 77 | m | 0 | 0 | 0 | 1 |
| 17 | cgi_236 | urine | positive | ta  | lg | 76 | m | 0 | 0 | 0 | 1 |
| 18 | cgi_235 | urine | positive | ta  | lg | 69 | m | 0 | 0 | 0 | 1 |
| 18 | cgi_248 | urine | positive | ta  | lg | 70 | m | 0 | 0 | 0 | 1 |
| 19 | cgi_364 | urine | positive | ta  | lg | 67 | f | 0 | 0 | 0 | 1 |
| 19 | cgi_290 | urine | positive | ta  | lg | 67 | f | 0 | 0 | 0 | 1 |
| 20 | cgi_385 | urine | positive | ta  | hg | 77 | m | 0 | 0 | 0 | 1 |
| 20 | cgi_003 | tumor | positive | ta  | hg | 77 | m | 0 | 1 | 1 | 0 |
| 20 | cgi_004 | urine | positive | ta  | hg | 77 | m | 0 | 1 | 1 | 0 |
| 20 | cgi_005 | urine | negative | ta  | hg | 77 | m | 0 | 1 | 0 | 0 |
| 21 | cgi_332 | urine | positive | ta  | lg | 72 | m | 0 | 0 | 0 | 1 |
| 21 | cgi_266 | urine | positive | ta  | lg | 71 | m | 0 | 0 | 0 | 1 |
| 21 | cgi_391 | urine | positive | ta  | lg | 72 | m | 0 | 0 | 0 | 1 |
| 22 | cgi_008 | urine | positive | ta  | lg | 64 | m | 1 | 1 | 0 | 0 |
| 22 | cgi_007 | tumor | positive | ta  | lg | 64 | m | 1 | 1 | 1 | 0 |
| 22 | cgi_010 | urine | negative | ta  | lg | 65 | m | 1 | 1 | 0 | 1 |
| 22 | cgi_009 | urine | negative | ta  | lg | 65 | m | 1 | 1 | 0 | 1 |
| 22 | cgi_011 | urine | negative | ta  | lg | 65 | m | 1 | 1 | 0 | 1 |
| 22 | cgi_006 | urine | positive | ta  | lg | 64 | m | 0 | 1 | 1 | 1 |
| 24 | cgi_141 | urine | positive | ta  | lg | 58 | m | 0 | 0 | 0 | 1 |
| 24 | cgi_146 | urine | negative | ta  | lg | 58 | m | 0 | 0 | 0 | 1 |
| 26 | cgi_014 | tumor | positive | ta  | lg | 64 | f | 0 | 1 | 1 | 0 |
| 26 | cgi_015 | urine | negative | ta  | lg | 64 | f | 0 | 1 | 0 | 1 |
| 26 | cgi_013 | urine | positive | ta  | lg | 64 | f | 0 | 1 | 1 | 1 |
| 27 | cgi_406 | urine | negative |     |    | 78 | m | 0 | 0 | 0 | 1 |
| 27 | cgi_338 | urine | positive | ta  | lg | 77 | m | 0 | 0 | 0 | 1 |
| 28 | cgi_397 | urine | positive | ta  | hg | 77 | f | 0 | 0 | 0 | 1 |
| 28 | cgi_277 | urine | positive | ta  | hg | 76 | f | 0 | 0 | 0 | 1 |
| 29 | cgi_322 | urine | positive | ta  | lg | 81 | m | 0 | 0 | 0 | 1 |
| 29 | cgi_350 | urine | positive | cis | hg | 81 | m | 0 | 0 | 0 | 1 |
| 30 | cgi_016 | urine | positive | t4  | hg | 75 | m | 1 | 1 | 0 | 1 |
| 30 | cgi_019 | urine | positive | t4  | hg | 75 | m | 0 | 1 | 1 | 1 |
| 30 | cgi_017 | tumor | positive | t4  | hg | 75 | m | 1 | 1 | 1 | 0 |
| 31 | cgi_023 | urine | negative | ta  | hg | 84 | m | 1 | 1 | 0 | 1 |
| 31 | cgi_021 | urine | negative | ta  | hg | 84 | m | 1 | 1 | 0 | 0 |
| 31 | cgi_020 | tumor | positive | ta  | hg | 84 | m | 1 | 1 | 0 | 0 |
| 31 | cgi_022 | urine | negative | ta  | hg | 84 | m | 1 | 1 | 0 | 1 |
| 32 | cgi_269 | urine | negative | ta  | hg | 83 | m | 0 | 0 | 0 | 1 |
| 32 | cgi_396 | urine | negative |     |    | 84 | m | 0 | 0 | 0 | 1 |
| 33 | cgi_339 | urine | negative |     | hg | 67 | m | 0 | 0 | 0 | 1 |
| 33 | cgi_404 | urine | negative |     | hg | 97 | m | 0 | 0 | 0 | 1 |
| 33 | cgi_393 | urine | negative |     | hg | 67 | m | 0 | 0 | 0 | 1 |
| 33 | cgi_275 | urine | negative | t1  | lg | 67 | m | 0 | 0 | 0 | 1 |
| 34 | cgi_389 | urine | negative | cis | hg | 59 | m | 0 | 0 | 0 | 1 |
| 34 | cgi_405 | urine | negative | cis | hg | 59 | m | 0 | 0 | 0 | 1 |
| 34 | cgi_337 | urine | negative | cis | hg | 59 | m | 0 | 0 | 0 | 1 |
| 34 | cgi_264 | urine | negative | cis | hg | 58 | m | 0 | 0 | 0 | 1 |
| 34 | cgi_302 | urine | negative | cis | hg | 59 | m | 0 | 0 | 0 | 1 |
| 35 | cgi_025 | urine | positive | ta  | lg | 92 | f | 0 | 1 | 1 | 1 |

|    |         |       |          |             |             |    |   |   |   |   |   |
|----|---------|-------|----------|-------------|-------------|----|---|---|---|---|---|
| 35 | cgi_024 | tumor | positive | ta          | lg          | 92 | f | 0 | 1 | 1 | 0 |
| 35 | cgi_098 | urine | negative | ta          | lg          | 92 | f | 0 | 1 | 0 | 1 |
| 35 | cgi_026 | urine | negative | ta          | lg          | 92 | f | 0 | 1 | 0 | 1 |
| 36 | cgi_094 | urine | negative | ta          | lg          | 84 | m | 0 | 1 | 0 | 1 |
| 36 | cgi_028 | urine | negative | ta          | lg          | 84 | m | 0 | 1 | 0 | 1 |
| 36 | cgi_027 | tumor | positive | ta          | lg          | 84 | m | 0 | 1 | 0 | 0 |
| 37 | cgi_381 | urine | negative | ta          | lg          | 71 | m | 0 | 0 | 0 | 1 |
| 37 | cgi_270 | urine | negative | ta          | lg          | 71 | m | 0 | 0 | 0 | 1 |
| 38 | cgi_032 | urine | negative | ta          | lg          | 69 | f | 0 | 1 | 0 | 0 |
| 38 | cgi_030 | urine | positive | ta          | lg          | 69 | f | 0 | 1 | 1 | 1 |
| 38 | cgi_029 | tumor | positive | ta          | lg          | 69 | f | 0 | 1 | 1 | 0 |
| 38 | cgi_097 | urine | negative | ta          | lg          | 69 | f | 0 | 1 | 0 | 1 |
| 38 | cgi_093 | urine | negative | ta          | lg          | 69 | f | 0 | 1 | 0 | 1 |
| 39 | cgi_394 | urine | negative |             |             | 68 | m | 0 | 0 | 0 | 1 |
| 39 | cgi_293 | urine | negative | ta          | lg          | 68 | m | 0 | 0 | 0 | 1 |
| 40 | cgi_402 | urine | negative |             |             | 76 | m | 0 | 0 | 0 | 1 |
| 40 | cgi_301 | urine | negative |             |             | 76 | m | 0 | 0 | 0 | 1 |
| 41 | cgi_376 | urine | positive | ta          | lg          | 74 | m | 0 | 0 | 0 | 1 |
| 41 | cgi_375 | urine | positive | ta          | lg          | 74 | m | 0 | 0 | 0 | 1 |
| 41 | cgi_286 | urine | positive | ta          | lg          | 75 | m | 0 | 0 | 0 | 1 |
| 42 | cgi_035 | tumor | positive | t2          | hg          | 75 | f | 1 | 1 | 1 | 0 |
| 42 | cgi_033 | urine | positive | t2          | hg          | 75 | f | 1 | 1 | 1 | 1 |
| 42 | cgi_034 | urine | positive | t2          | hg          | 75 | f | 1 | 1 | 0 | 1 |
| 43 | cgi_037 | tumor | positive | t1          | hg          | 84 | m | 0 | 1 | 1 | 0 |
| 43 | cgi_038 | urine | positive | t1          | hg          | 84 | m | 0 | 1 | 0 | 1 |
| 43 | cgi_036 | urine | positive | t1          | hg          | 84 | m | 0 | 1 | 1 | 1 |
| 45 | cgi_039 | tumor | positive | ta          | lg          | 69 | f | 0 | 1 | 1 | 0 |
| 45 | cgi_040 | urine | positive | ta          | lg          | 69 | f | 0 | 1 | 1 | 1 |
| 45 | cgi_096 | urine | positive | pun-<br>lmp | pun-<br>lmp | 69 | f | 0 | 1 | 0 | 0 |
| 46 | cgi_043 | urine | negative | t2          | hg          | 90 | m | 1 | 1 | 0 | 0 |
| 46 | cgi_041 | tumor | positive | t2          | hg          | 90 | m | 1 | 1 | 1 | 0 |
| 46 | cgi_042 | urine | positive | t2          | hg          | 90 | m | 1 | 1 | 1 | 1 |
| 47 | cgi_045 | urine | positive | t1          | hg          | 65 | m | 0 | 1 | 1 | 0 |
| 47 | cgi_044 | tumor | positive | t1          | hg          | 65 | m | 0 | 1 | 1 | 0 |
| 47 | cgi_046 | urine | positive | t1          | hg          | 65 | m | 0 | 1 | 0 | 1 |
| 48 | cgi_217 | urine | negative | t1          | hg          | 80 | f | 0 | 0 | 0 | 1 |
| 48 | cgi_215 | urine | negative | t1          | hg          | 81 | f | 0 | 0 | 0 | 1 |
| 48 | cgi_209 | urine | negative | t1          | hg          | 80 | f | 0 | 0 | 0 | 1 |
| 48 | cgi_208 | urine | negative | t1          | hg          | 80 | f | 0 | 0 | 0 | 1 |
| 48 | cgi_206 | urine | negative | t1          | hg          | 80 | f | 0 | 0 | 0 | 1 |
| 49 | cgi_304 | urine | negative | ta          | hg          | 80 | m | 0 | 0 | 0 | 1 |
| 49 | cgi_323 | urine | negative | ta          | hg          | 80 | m | 0 | 0 | 0 | 1 |
| 50 | cgi_326 | urine | positive | ta          | lg          | 86 | m | 0 | 0 | 0 | 1 |
| 51 | cgi_327 | urine | negative | t1          | hg          | 59 | m | 0 | 0 | 0 | 1 |
| 51 | cgi_262 | urine | negative | t1          | hg          | 58 | m | 0 | 0 | 0 | 1 |
| 52 | cgi_265 | urine | positive |             |             | 67 | m | 0 | 0 | 0 | 1 |
| 52 | cgi_334 | urine | positive | ta          | lg          | 67 | m | 0 | 0 | 0 | 1 |
| 53 | cgi_346 | urine | negative | t2          | hg          | 71 | m | 0 | 0 | 0 | 1 |

|    |         |       |          |                 |                 |    |   |   |   |   |   |
|----|---------|-------|----------|-----------------|-----------------|----|---|---|---|---|---|
| 53 | cgi_294 | urine | negative | t2              | hg              | 71 | m | 0 | 0 | 0 | 1 |
| 54 | cgi_384 | urine | negative | t1              | hg              | 69 | m | 0 | 0 | 0 | 1 |
| 54 | cgi_271 | urine | negative | t1              | hg              | 69 | m | 0 | 0 | 0 | 1 |
| 56 | cgi_386 | urine | negative | t1              | lg              | 49 | m | 0 | 0 | 0 | 1 |
| 56 | cgi_285 | urine | negative | t1              | lg              | 49 | m | 0 | 0 | 0 | 1 |
| 56 | cgi_284 | urine | negative | t1              | lg              | 49 | m | 0 | 0 | 0 | 1 |
| 57 | cgi_202 | urine | negative | ta              | hg              | 85 | f | 0 | 0 | 0 | 1 |
| 57 | cgi_214 | urine | negative | ta              | hg              | 86 | f | 0 | 0 | 0 | 1 |
| 58 | cgi_256 | urine | positive | ta              | lg              | 88 | m | 0 | 0 | 0 | 1 |
| 58 | cgi_246 | urine | positive | t1              | lg              | 86 | m | 0 | 0 | 0 | 1 |
| 59 | cgi_175 | urine | negative | ta              | hg              | 87 | m | 0 | 0 | 0 | 1 |
| 59 | cgi_173 | urine | positive | ta              | hg              | 87 | m | 0 | 0 | 0 | 1 |
| 60 | cgi_230 | urine | negative |                 |                 | 54 | f | 0 | 0 | 0 | 1 |
| 60 | cgi_224 | urine | negative |                 |                 | 54 | f | 0 | 0 | 0 | 1 |
| 61 | cgi_154 | urine | negative |                 |                 | 76 | m | 0 | 0 | 0 | 1 |
| 61 | cgi_171 | urine | negative |                 |                 | 76 | m | 0 | 0 | 0 | 1 |
| 62 | cgi_047 | tumor | positive | ta              | lg              | 69 | m | 0 | 1 | 0 | 0 |
| 62 | cgi_049 | urine | negative | ta              | lg              | 69 | m | 0 | 1 | 0 | 1 |
| 63 | cgi_092 | urine | negative | t2              | hg              | 80 | f | 0 | 1 | 0 | 0 |
| 63 | cgi_050 | tumor | positive | t2              | hg              | 80 | f | 0 | 1 | 0 | 0 |
| 64 | cgi_051 | tumor | positive | t1              | hg              | 84 | m | 1 | 1 | 1 | 0 |
| 64 | cgi_052 | urine | positive | t1              | hg              | 84 | m | 1 | 1 | 1 | 1 |
| 65 | cgi_054 | urine | positive | ta              | hg              | 77 | m | 0 | 1 | 1 | 1 |
| 65 | cgi_053 | tumor | positive | ta              | hg              | 77 | m | 0 | 1 | 1 | 0 |
| 66 | cgi_095 | urine | negative | t2              | hg              | 78 | m | 0 | 1 | 0 | 0 |
| 66 | cgi_055 | tumor | positive | t2              | hg              | 78 | m | 0 | 1 | 0 | 0 |
| 67 | cgi_056 | tumor | positive | ta              | hg              | 63 | m | 0 | 1 | 1 | 0 |
| 67 | cgi_058 | urine | positive | ta              | hg              | 63 | m | 0 | 1 | 1 | 1 |
| 68 | cgi_059 | urine | positive | ta              | lg              | 72 | m | 0 | 1 | 1 | 1 |
| 68 | cgi_060 | tumor | positive | ta              | lg              | 72 | m | 0 | 1 | 1 | 0 |
| 69 | cgi_061 | urine | positive | ta              | lg              | 82 | m | 1 | 1 | 1 | 1 |
| 69 | cgi_062 | tumor | positive | ta              | lg              | 82 | m | 1 | 1 | 1 | 0 |
| 70 | cgi_064 | tumor | positive | t1              | hg              | 84 | m | 1 | 1 | 1 | 0 |
| 70 | cgi_063 | urine | positive | t1              | hg              | 84 | m | 1 | 1 | 1 | 1 |
| 71 | cgi_067 | urine | negative | ta              | lg              | 58 | m | 0 | 1 | 0 | 1 |
| 71 | cgi_065 | tumor | positive | ta              | lg              | 58 | m | 0 | 1 | 0 | 0 |
| 71 | cgi_066 | urine | negative | Ta              | lg              | 58 | m | 0 | 1 | 0 | 1 |
| 72 | cgi_069 | urine | positive | para-gangli-oma | para-gangli-oma | 69 | m | 0 | 0 | 1 | 0 |
| 72 | cgi_068 | tumor | positive | para-gangli-oma | para-gangli-oma | 69 | m | 0 | 0 | 1 | 0 |
| 73 | cgi_205 | urine | positive |                 | hg              | 74 | m | 0 | 0 | 0 | 1 |
| 73 | cgi_198 | urine | positive | ta              | hg              | 74 | m | 0 | 0 | 0 | 1 |
|    | cgi_099 | urine | positive | t1              | hg              | 57 | m | 0 | 0 | 0 | 1 |
|    | cgi_100 | urine | positive | t1              | hg              |    | m | 0 | 0 | 0 | 1 |
|    | cgi_101 | urine | positive | t1              | hg              |    | m | 0 | 0 | 0 | 1 |
|    | cgi_102 | urine | positive | t1              | hg              |    | m | 0 | 0 | 0 | 1 |



|         |       |          |        |    |    |   |   |   |   |
|---------|-------|----------|--------|----|----|---|---|---|---|
| cgi_103 | urine | positive | t1     | hg | m  | 0 | 0 | 0 | 1 |
| cgi_104 | urine | positive | t4     | hg | f  | 0 | 0 | 0 | 1 |
| cgi_105 | urine | negative |        |    | m  | 0 | 0 | 0 | 1 |
| cgi_106 | urine | positive | t2     | hg | f  | 0 | 0 | 0 | 1 |
| cgi_107 | urine | positive | ta     | hg | m  | 0 | 0 | 0 | 1 |
| cgi_108 | urine | positive | ta     | hg | m  | 0 | 0 | 0 | 1 |
| cgi_109 | urine | positive | ta     | lg | 69 | m | 0 | 0 | 1 |
| cgi_110 | urine | negative |        |    | 84 | m | 0 | 0 | 1 |
| cgi_111 | urine | positive | cis    | hg | 60 | m | 0 | 0 | 1 |
| cgi_112 | urine | positive | ta     | hg | m  | 0 | 0 | 0 | 1 |
| cgi_113 | urine | positive | t1     | hg | m  | 0 | 0 | 0 | 1 |
| cgi_114 | urine | positive | t2     | hg | m  | 0 | 0 | 0 | 1 |
| cgi_115 | urine | positive | ta     | lg | m  | 0 | 0 | 0 | 1 |
| cgi_116 | urine | negative | ta     | lg | m  | 0 | 0 | 0 | 1 |
| cgi_117 | urine | positive | t1     | hg | m  | 0 | 0 | 0 | 1 |
| cgi_118 | urine | positive | t4     | hg | f  | 0 | 0 | 0 | 1 |
| cgi_119 | urine | positive | t2     | hg | f  | 0 | 0 | 0 | 1 |
| cgi_120 | urine | positive | t2     | hg | m  | 0 | 0 | 0 | 1 |
| cgi_121 | urine | positive |        | hg | m  | 0 | 0 | 0 | 1 |
| cgi_124 | urine | positive | ta     | lg | 67 | m | 0 | 0 | 1 |
| cgi_125 | urine | negative |        |    | 81 | m | 0 | 0 | 1 |
| cgi_126 | urine | positive | t2     | hg | 75 | m | 0 | 0 | 1 |
| cgi_129 | urine | negative | ta,cis | hg | 66 | m | 0 | 0 | 1 |
| cgi_135 | urine | negative | ta     | lg | 72 | m | 0 | 0 | 1 |
| cgi_137 | urine | positive | ta     | lg | 56 | f | 0 | 0 | 1 |
| cgi_138 | urine | negative | t1     | lg | 69 | m | 0 | 0 | 1 |
| cgi_139 | urine | negative | t1     | hg | 89 | m | 0 | 0 | 1 |
| cgi_140 | urine | negative | ta     | lg | 78 | m | 0 | 0 | 1 |
| cgi_142 | urine | positive |        |    | 72 | m | 0 | 0 | 1 |
| cgi_144 | urine | negative | ta     | lg | 59 | m | 0 | 0 | 1 |
| cgi_145 | urine | negative | ta     | lg | 70 | m | 0 | 0 | 1 |
| cgi_147 | urine | negative | ta     | lg | 84 | f | 0 | 0 | 1 |
| cgi_148 | urine | negative | ta     | lg | 67 | f | 0 | 0 | 1 |
| cgi_149 | urine | negative |        |    | 20 | f | 0 | 0 | 1 |
| cgi_150 | urine | negative |        |    | 72 | m | 0 | 0 | 1 |
| cgi_151 | urine | negative |        |    | 32 | m | 0 | 0 | 1 |
| cgi_152 | urine | negative | ta     | lg | 72 | m | 0 | 0 | 1 |
| cgi_153 | urine | negative |        |    | 62 | f | 0 | 0 | 1 |
| cgi_155 | urine | negative |        |    | 87 | m | 0 | 0 | 1 |
| cgi_156 | urine | negative | ta     | lg | 71 | m | 0 | 0 | 1 |
| cgi_157 | urine | negative |        |    | 64 | m | 0 | 0 | 1 |
| cgi_159 | urine | negative |        |    | 89 | m | 0 | 0 | 1 |
| cgi_160 | urine | negative | t1     | lg | 72 | m | 0 | 0 | 1 |
| cgi_162 | urine | negative |        |    | 85 | f | 0 | 0 | 1 |
| cgi_163 | urine | negative |        |    | 90 | m | 0 | 0 | 1 |
| cgi_164 | urine | negative |        |    | 84 | f | 0 | 0 | 1 |
| cgi_165 | urine | negative |        |    | 57 | m | 0 | 0 | 1 |
| cgi_168 | urine | negative |        |    | 77 | f | 0 | 0 | 1 |
| cgi_169 | urine | negative |        |    | 81 | f | 0 | 0 | 1 |

|         |       |          |    |    |    |          |   |   |   |   |
|---------|-------|----------|----|----|----|----------|---|---|---|---|
| cgi_170 | urine | negative | t3 | hg | 77 | m        | 0 | 0 | 0 | 1 |
| cgi_174 | urine | negative |    | hg | 75 | f        | 0 | 0 | 0 | 1 |
| cgi_176 | urine | negative | ta | lg | 74 | f        | 0 | 0 | 0 | 1 |
| cgi_177 | urine | negative | ta | lg | 89 | m        | 0 | 0 | 0 | 1 |
| cgi_178 | urine | negative |    |    | 92 | f        | 0 | 0 | 0 | 1 |
| cgi_179 | urine | negative | ta | lg | 78 | f        | 0 | 0 | 0 | 1 |
| cgi_180 | urine | negative | t1 | lg | 76 | m        | 0 | 0 | 0 | 1 |
| cgi_181 | urine | negative | ta | hg | 81 | m        | 0 | 0 | 0 | 1 |
| cgi_182 | urine | positive | ta | lg | 72 | m        | 0 | 0 | 0 | 1 |
| cgi_184 | urine | positive | ta | lg | 71 | m        | 0 | 0 | 0 | 1 |
| cgi_186 | urine | positive | t4 | hg |    | m        | 0 | 0 | 0 | 1 |
| cgi_187 | urine | negative |    |    | 34 | m        | 0 | 0 | 0 | 1 |
| cgi_188 | urine | negative |    |    | 22 | f        | 0 | 0 | 0 | 1 |
| cgi_189 | urine | negative |    |    | 64 | m        | 0 | 0 | 0 | 1 |
| cgi_190 | urine | negative |    |    | 55 | m        | 0 | 0 | 0 | 1 |
| cgi_191 | urine | negative |    |    | 83 | m        | 0 | 0 | 0 | 1 |
| cgi_192 | urine | positive | ta | lg | 68 | m        | 0 | 0 | 0 | 1 |
| cgi_193 | urine | negative |    |    | 67 | m        | 0 | 0 | 0 | 1 |
| cgi_196 | urine | negative |    |    | 82 | m        | 0 | 0 | 0 | 1 |
| cgi_197 | urine | negative |    |    | 69 | f        | 0 | 0 | 0 | 1 |
| cgi_199 | urine | negative | ta | lg | 77 | f        | 0 | 0 | 0 | 1 |
| cgi_200 | urine | negative |    |    | 68 | m        | 0 | 0 | 0 | 1 |
| cgi_201 | urine | negative |    |    | 81 | f        | 0 | 0 | 0 | 1 |
| cgi_203 | urine | negative |    |    | 83 | f        | 0 | 0 | 0 | 1 |
| cgi_204 | urine | negative |    |    | 86 | m        | 0 | 0 | 0 | 1 |
| cgi_211 | urine | negative | ta | lg | 73 | f        | 0 | 0 | 0 | 1 |
| cgi_219 | urine | negative |    |    | 80 | f        | 0 | 0 | 0 | 1 |
| cgi_221 | urine | negative |    |    | 62 | m        | 0 | 0 | 0 | 1 |
| cgi_222 | urine | negative |    |    | 73 | m        | 0 | 0 | 0 | 1 |
| cgi_223 | urine | negative |    |    | 60 | m        | 0 | 0 | 0 | 1 |
| cgi_225 | urine | negative |    |    | 80 | m        | 0 | 0 | 0 | 1 |
| cgi_226 | urine | negative |    |    | 64 | m        | 0 | 0 | 0 | 1 |
| cgi_227 | urine | negative |    |    | 56 | m        | 0 | 0 | 0 | 1 |
| cgi_228 | urine | negative |    |    | 56 | m        | 0 | 0 | 0 | 1 |
| cgi_229 | urine | positive | ta | hg | 92 | f        | 0 | 0 | 0 | 1 |
| cgi_231 | urine | negative |    |    | 39 | f        | 0 | 0 | 0 | 1 |
| cgi_232 | urine | negative |    |    | 71 | m        | 0 | 0 | 0 | 1 |
| cgi_233 | urine | negative |    |    | 28 | f        | 0 | 0 | 0 | 1 |
| cgi_237 | urine | positive | t3 | hg | 66 | m        | 0 | 0 | 0 | 1 |
| cgi_238 | urine | positive |    | hg | 94 | m        | 0 | 0 | 0 | 1 |
| cgi_239 | urine | negative |    |    | 73 | m        | 0 | 0 | 0 | 1 |
| cgi_240 | urine | negative |    |    | 55 | f        | 0 | 0 | 0 | 1 |
| cgi_241 | urine | positive | t2 | hg | 67 | m        | 0 | 0 | 0 | 1 |
| cgi_242 | urine | negative |    |    |    | un-known | 0 | 0 | 0 | 1 |
| cgi_243 | urine | positive | ta | lg | 84 | m        | 0 | 0 | 0 | 1 |
| cgi_244 | urine | negative |    |    | 65 | f        | 0 | 0 | 0 | 1 |
| cgi_257 | urine | positive | ta | hg | 84 | m        | 0 | 0 | 0 | 1 |

|         |       |          |        |    |    |   |   |   |   |   |
|---------|-------|----------|--------|----|----|---|---|---|---|---|
| cgi_258 | urine | positive | ta,cis | hg | 60 | m | 0 | 0 | 0 | 1 |
| cgi_259 | urine | negative |        |    | 66 | f | 0 | 0 | 0 | 1 |
| cgi_260 | urine | negative |        |    | 35 | m | 0 | 0 | 0 | 1 |
| cgi_261 | urine | negative |        |    | 78 | m | 0 | 0 | 0 | 1 |
| cgi_263 | urine | negative |        |    | 88 | f | 0 | 0 | 0 | 1 |
| cgi_267 | urine | negative | ta     | lg | 76 | m | 0 | 0 | 0 | 1 |
| cgi_268 | urine | negative | ta,cis | hg | 72 | m | 0 | 0 | 0 | 1 |
| cgi_272 | urine | negative | ta     | lg | 57 | m | 0 | 0 | 0 | 1 |
| cgi_273 | urine | negative |        |    | 71 | f | 0 | 0 | 0 | 1 |
| cgi_274 | urine | negative |        |    | 45 | f | 0 | 0 | 0 | 1 |
| cgi_276 | urine | negative | ta     | hg | 54 | m | 0 | 0 | 0 | 1 |
| cgi_278 | urine | negative |        |    | 80 | f | 0 | 0 | 0 | 1 |
| cgi_279 | urine | negative | ta     | lg | 59 | m | 0 | 0 | 0 | 1 |
| cgi_280 | urine | negative |        |    | 44 | f | 0 | 0 | 0 | 1 |
| cgi_281 | urine | negative | ta     | lg | 71 | m | 0 | 0 | 0 | 1 |
| cgi_282 | urine | negative | t1     | hg |    |   | 0 | 0 | 0 | 1 |
| cgi_283 | urine | negative |        |    | 65 | m | 0 | 0 | 0 | 1 |
| cgi_287 | urine | negative |        |    | 44 | f | 0 | 0 | 0 | 1 |
| cgi_288 | urine | negative | ta     | lg | 66 | m | 0 | 0 | 0 | 1 |
| cgi_289 | urine | negative |        |    | 80 | f | 0 | 0 | 0 | 1 |
| cgi_291 | urine | negative | ta     | lg | 68 | m | 0 | 0 | 0 | 1 |
| cgi_292 | urine | negative | t1     | hg | 85 | m | 0 | 0 | 0 | 1 |
| cgi_295 | urine | negative | ta     | lg | 79 | m | 0 | 0 | 0 | 1 |
| cgi_296 | urine | negative | ta     | lg | 73 | m | 0 | 0 | 0 | 1 |
| cgi_297 | urine | negative | t1     | hg | 80 | m | 0 | 0 | 0 | 1 |
| cgi_298 | urine | negative |        |    | 74 | m | 0 | 0 | 0 | 1 |
| cgi_299 | urine | negative | ta     | lg | 65 | m | 0 | 0 | 0 | 1 |
| cgi_300 | urine | negative |        |    | 64 | f | 0 | 0 | 0 | 1 |
| cgi_303 | urine | positive | ta     | lg | 79 | f | 0 | 0 | 0 | 1 |
| cgi_305 | urine | negative |        |    | 81 | f | 0 | 0 | 0 | 1 |
| cgi_306 | urine | negative |        |    | 51 | f | 0 | 0 | 0 | 1 |
| cgi_307 | urine | negative |        |    | 68 | f | 0 | 0 | 0 | 1 |
| cgi_308 | urine | negative | ta     | lg | 66 | m | 0 | 0 | 0 | 1 |
| cgi_309 | urine | positive | ta     | lg | 50 | m | 0 | 0 | 0 | 1 |
| cgi_310 | urine | negative |        |    | 84 | m | 0 | 0 | 0 | 1 |
| cgi_311 | urine | negative |        |    | 48 | m | 0 | 0 | 0 | 1 |
| cgi_312 | urine | negative | ta     | hg | 64 | m | 0 | 0 | 0 | 1 |
| cgi_313 | urine | negative | t1     | hg | 80 | m | 0 | 0 | 0 | 1 |
| cgi_314 | urine | positive |        |    | 86 | m | 0 | 0 | 0 | 1 |
| cgi_315 | urine | negative |        |    | 18 | f | 0 | 0 | 0 | 1 |
| cgi_316 | urine | negative |        |    | 46 | m | 0 | 0 | 0 | 1 |
| cgi_317 | urine | negative | ta     | lg | 49 | f | 0 | 0 | 0 | 1 |
| cgi_318 | urine | negative |        |    | 47 | f | 0 | 0 | 0 | 1 |
| cgi_319 | urine | positive | cis    | hg | 83 | m | 0 | 0 | 0 | 1 |
| cgi_320 | urine | negative |        |    | 70 | m | 0 | 0 | 0 | 1 |
| cgi_321 | urine | negative |        |    | 39 | m | 0 | 0 | 0 | 1 |
| cgi_324 | urine | negative | t1     | hg | 80 | m | 0 | 0 | 0 | 1 |
| cgi_325 | urine | negative |        |    | 62 | m | 0 | 0 | 0 | 1 |
| cgi_328 | urine | negative |        |    | 70 | m | 0 | 0 | 0 | 1 |

|         |       |          |    |    |    |   |   |   |   |   |
|---------|-------|----------|----|----|----|---|---|---|---|---|
| cgi_329 | urine | positive | ta | lg | 84 | f | 0 | 0 | 0 | 1 |
| cgi_330 | urine | negative |    |    | 82 | f | 0 | 0 | 0 | 1 |
| cgi_331 | urine | negative |    |    | 41 | m | 0 | 0 | 0 | 1 |
| cgi_333 | urine | negative | ta | lg | 80 | f | 0 | 0 | 0 | 1 |
| cgi_335 | urine | negative |    |    | 60 | f | 0 | 0 | 0 | 1 |
| cgi_336 | urine | negative |    |    | 59 | m | 0 | 0 | 0 | 1 |
| cgi_340 | urine | negative |    |    | 72 | f | 0 | 0 | 0 | 1 |
| cgi_341 | urine | negative | ta | lg | 80 | m | 0 | 0 | 0 | 1 |
| cgi_342 | urine | negative |    |    | 61 | m | 0 | 0 | 0 | 1 |
| cgi_343 | urine | negative | ta | lg | 79 | f | 0 | 0 | 0 | 1 |
| cgi_344 | urine | positive | ta | lg | 78 | m | 0 | 0 | 0 | 1 |
| cgi_345 | urine | negative |    |    | 77 | m | 0 | 0 | 0 | 1 |
| cgi_347 | urine | positive | t2 | hg | 80 | f | 0 | 0 | 0 | 1 |
| cgi_348 | urine | negative |    |    | 43 | f | 0 | 0 | 0 | 1 |
| cgi_349 | urine | negative |    |    | 39 | m | 0 | 0 | 0 | 1 |
| cgi_351 | urine | negative |    |    | 69 | m | 0 | 0 | 0 | 1 |
| cgi_352 | urine | negative |    |    | 38 | f | 0 | 0 | 0 | 1 |
| cgi_353 | urine | negative |    |    | 70 | m | 0 | 0 | 0 | 1 |
| cgi_354 | urine | negative | t1 | hg | 79 | m | 0 | 0 | 0 | 1 |
| cgi_355 | urine | negative | ta | hg | 65 | m | 0 | 0 | 0 | 1 |
| cgi_356 | urine | negative |    |    | 26 | f | 0 | 0 | 0 | 1 |
| cgi_357 | urine | negative | t1 | hg | 77 | m | 0 | 0 | 0 | 1 |
| cgi_358 | urine | negative |    |    | 72 | f | 0 | 0 | 0 | 1 |
| cgi_359 | urine | negative |    |    | 45 | m | 0 | 0 | 0 | 1 |
| cgi_360 | urine | negative |    |    | 86 | m | 0 | 0 | 0 | 1 |
| cgi_361 | urine | negative |    |    | 21 | f | 0 | 0 | 0 | 1 |
| cgi_362 | urine | negative |    |    | 26 | m | 0 | 0 | 0 | 1 |
| cgi_363 | urine | negative |    |    | 51 | f | 0 | 0 | 0 | 1 |
| cgi_365 | urine | negative |    |    | 80 | f | 0 | 0 | 0 | 1 |
| cgi_366 | urine | positive | ta | lg | 75 | m | 0 | 0 | 0 | 1 |
| cgi_367 | urine | negative | ta | hg | 67 | m | 0 | 0 | 0 | 1 |
| cgi_368 | urine | negative |    |    | 41 | m | 0 | 0 | 0 | 1 |
| cgi_369 | urine | negative |    |    | 73 | m | 0 | 0 | 0 | 1 |
| cgi_370 | urine | negative | ta | hg | 76 | m | 0 | 0 | 0 | 1 |
| cgi_371 | urine | negative |    |    | 47 | m | 0 | 0 | 0 | 1 |
| cgi_372 | urine | negative |    |    | 28 | m | 0 | 0 | 0 | 1 |
| cgi_373 | urine | negative |    |    | 38 | f | 0 | 0 | 0 | 1 |
| cgi_374 | urine | negative |    |    | 41 | m | 0 | 0 | 0 | 1 |
| cgi_377 | urine | negative |    |    | 61 | m | 0 | 0 | 0 | 1 |
| cgi_378 | urine | negative |    |    | 85 | f | 0 | 0 | 0 | 1 |
| cgi_379 | urine | negative | ta | lg | 65 | m | 0 | 0 | 0 | 1 |
| cgi_380 | urine | positive | t1 | hg | 84 | m | 0 | 0 | 0 | 1 |
| cgi_382 | urine | positive | ta | lg | 77 | f | 0 | 0 | 0 | 1 |
| cgi_383 | urine | negative | ta | lg | 82 | m | 0 | 0 | 0 | 1 |
| cgi_387 | urine | negative | t1 | hg | 78 | m | 0 | 0 | 0 | 1 |
| cgi_388 | urine | negative | ta | lg | 56 | m | 0 | 0 | 0 | 1 |
| cgi_390 | urine | negative | ta | lg | 49 | m | 0 | 0 | 0 | 1 |
| cgi_392 | urine | negative | t1 | hg | 78 | m | 0 | 0 | 0 | 1 |
| cgi_395 | urine | negative | ta | lg | 84 | f | 0 | 0 | 0 | 1 |

|         |       |          |    |    |    |   |   |   |   |   |
|---------|-------|----------|----|----|----|---|---|---|---|---|
| cgi_398 | urine | negative | ta | lg | 69 | m | 0 | 0 | 0 | 1 |
| cgi_399 | urine | positive | ta | lg | 76 | m | 0 | 0 | 0 | 1 |
| cgi_400 | urine | negative |    |    | 71 | f | 0 | 0 | 0 | 1 |
| cgi_401 | urine | negative | t1 | hg | 75 | f | 0 | 0 | 0 | 1 |
| cgi_403 | urine | negative | t1 | hg | 66 | m | 0 | 0 | 0 | 1 |
| cgi_407 | urine | negative | ta | lg | 73 | m | 0 | 0 | 0 | 1 |
| cgi_408 | urine | negative | ta | hg | 75 | m | 0 | 0 | 0 | 1 |
| cgi_409 | urine | negative |    |    | 72 | m | 0 | 0 | 0 | 1 |
| cgi_410 | urine | negative | ta | lg | 71 | m | 0 | 0 | 0 | 1 |
| cgi_411 | urine | negative | t1 | hg | 63 | m | 0 | 0 | 0 | 1 |
| cgi_412 | urine | negative |    |    |    | f | 0 | 0 | 0 | 1 |
| cgi_413 | urine | negative |    |    |    | f | 0 | 0 | 0 | 1 |
| cgi_414 | urine | negative |    |    |    | m | 0 | 0 | 0 | 1 |
| cgi_415 | urine | negative |    |    |    | f | 0 | 0 | 0 | 1 |
| cgi_416 | urine | negative |    |    |    | f | 0 | 0 | 0 | 1 |
| cgi_417 | urine | negative |    |    |    | f | 0 | 0 | 0 | 1 |
| cgi_418 | urine | negative |    |    |    | f | 0 | 0 | 0 | 1 |
| cgi_419 | urine | negative |    |    |    | m | 0 | 0 | 0 | 1 |
| cgi_420 | urine | negative |    |    |    | m | 0 | 0 | 0 | 1 |
| cgi_421 | urine | negative |    |    |    | m | 0 | 0 | 0 | 1 |
| cgi_422 | urine | negative |    |    | 71 | m | 0 | 0 | 0 | 1 |
| cgi_423 | urine | negative |    |    | 76 | m | 0 | 0 | 0 | 1 |
| cgi_424 | urine | negative |    |    | 64 | f | 0 | 0 | 0 | 1 |
| cgi_425 | urine | negative |    |    | 49 | f | 0 | 0 | 0 | 1 |
| cgi_426 | urine | negative |    |    | 78 | m | 0 | 0 | 0 | 1 |
| cgi_427 | urine | negative |    |    | 40 | f | 0 | 0 | 0 | 1 |
| cgi_428 | urine | negative |    |    | 36 | m | 0 | 0 | 0 | 1 |
| cgi_429 | urine | negative |    |    | 80 | f | 0 | 0 | 0 | 1 |
| cgi_430 | urine | negative |    |    | 90 | m | 0 | 0 | 0 | 1 |
| cgi_431 | urine | negative |    |    | 30 | f | 0 | 0 | 0 | 1 |
| cgi_432 | urine | negative |    |    | 28 | m | 0 | 0 | 0 | 1 |
| cgi_433 | urine | negative |    |    | 37 | m | 0 | 0 | 0 | 1 |
| cgi_434 | urine | negative |    |    | 56 | f | 0 | 0 | 0 | 1 |
| cgi_435 | urine | negative |    |    | 62 | f | 0 | 0 | 0 | 1 |
| cgi_436 | urine | negative |    |    | 60 | m | 0 | 0 | 0 | 1 |
| cgi_437 | urine | negative |    |    | 35 | m | 0 | 0 | 0 | 1 |
| cgi_439 | urine | negative |    |    | 59 | f | 0 | 0 | 0 | 1 |
| cgi_440 | urine | positive | t2 | hg |    | m | 0 | 0 | 0 | 1 |
| cgi_441 | urine | negative |    |    | 74 | f | 0 | 0 | 0 | 1 |
| cgi_442 | urine | negative |    |    | 73 | f | 0 | 0 | 0 | 1 |
| cgi_443 | urine | negative |    |    | 29 | f | 0 | 0 | 0 | 1 |
| cgi_444 | urine | negative |    |    | 45 | m | 0 | 0 | 0 | 1 |
| cgi_445 | urine | positive | ta | lg | 88 | m | 0 | 0 | 0 | 1 |
| cgi_446 | urine | negative |    |    | 68 | f | 0 | 0 | 0 | 1 |
| cgi_447 | urine | negative |    |    | 65 | m | 0 | 0 | 0 | 1 |
| cgi_448 | urine | negative |    |    | 56 | m | 0 | 0 | 0 | 1 |
| cgi_449 | urine | negative |    |    | 57 | f | 0 | 0 | 0 | 1 |
| cgi_450 | urine | negative |    |    | 57 | m | 0 | 0 | 0 | 1 |
| cgi_451 | urine | negative |    |    | 35 | f | 0 | 0 | 0 | 1 |

|         |       |          |     |    |    |   |   |   |   |   |
|---------|-------|----------|-----|----|----|---|---|---|---|---|
| cgi_452 | urine | negative |     |    | 58 | m | 0 | 0 | 0 | 1 |
| cgi_453 | urine | negative |     |    | 38 | f | 0 | 0 | 0 | 1 |
| cgi_454 | urine | negative |     |    | 72 | m | 0 | 0 | 0 | 1 |
| cgi_455 | urine | negative |     |    | 59 | f | 0 | 0 | 0 | 1 |
| cgi_456 | urine | negative |     |    | 58 | m | 0 | 0 | 0 | 1 |
| cgi_457 | urine | negative |     |    | 75 | m | 0 | 0 | 0 | 1 |
| cgi_458 | urine | negative |     |    | 72 | m | 0 | 0 | 0 | 1 |
| cgi_459 | urine | negative |     |    | 77 | m | 0 | 0 | 0 | 1 |
| cgi_460 | urine | negative |     |    | 59 | f | 0 | 0 | 0 | 1 |
| cgi_461 | urine | negative |     |    | 18 | f | 0 | 0 | 0 | 1 |
| cgi_462 | urine | negative |     |    | 62 | m | 0 | 0 | 0 | 1 |
| cgi_463 | urine | negative |     |    | 60 | m | 0 | 0 | 0 | 1 |
| cgi_464 | urine | negative |     |    | 69 | m | 0 | 0 | 0 | 1 |
| cgi_465 | urine | positive | t2  | hg |    | m | 0 | 0 | 0 | 1 |
| cgi_466 | urine | positive | ta  | hg |    | m | 0 | 0 | 0 | 1 |
| cgi_467 | urine | positive | ta  | lg |    | f | 0 | 0 | 0 | 1 |
| cgi_468 | urine | positive | cis | hg |    | m | 0 | 0 | 0 | 1 |
| cgi_469 | urine | positive | t2  | hg |    | m | 0 | 0 | 0 | 1 |
| cgi_470 | urine | positive | t1  | hg |    | m | 0 | 0 | 0 | 1 |
| cgi_471 | urine | positive | t2  | hg |    | f | 0 | 0 | 0 | 1 |
| cgi_472 | urine | positive | ta  | lg |    | f | 0 | 0 | 0 | 1 |
| cgi_473 | urine | positive | ta  | hg |    | m | 0 | 0 | 0 | 1 |
| cgi_474 | urine | positive | t2  | hg |    | m | 0 | 0 | 0 | 1 |
| cgi_475 | urine | positive | t4  | hg | 84 | f | 0 | 0 | 0 | 1 |
| cgi_476 | urine | positive | ta  | lg | 81 | m | 0 | 0 | 0 | 1 |
| cgi_477 | urine | positive | t3  | hg | 73 | m | 0 | 0 | 0 | 1 |
| cgi_478 | urine | positive | t1  | hg | 77 | f | 0 | 0 | 0 | 1 |
| cgi_479 | urine | positive | t1  | hg | 77 | f | 0 | 0 | 0 | 1 |
| cgi_480 | urine | positive | t1  | hg | 90 | f | 0 | 0 | 0 | 1 |
